# Supplementary material for: An Application of a Physiologically Based Pharmacokinetic Approach to Predict Ceftazidime Pharmacokinetics in a Pregnant Population
Source: MDPI journal article supplement (doi:10.3390/pharmaceutics16040474), 2024-03-28
Supplement: s1 [file s1]

# **An Application of a Physiologically Based Pharmacokinetic Approach to Predict Ceftazidime Pharmacokinetics in Pregnant Population**

**Khaled Abduljalil<sup>1\*</sup>, Iain Gardner<sup>1</sup>, Masoud Jamei<sup>1</sup>**

<sup>1</sup>Certara Predictive Technologies Division, Level 2-Acero, 1 Concourse Way, Sheffield, S1 2BJ, United Kingdom

## **Supplementary document**

### **Contents**

**Table S1.** Ceftazidime PBPK model input parameters

**Table S2.** Collected clinical data on fraction of the dose excreted in the urine.

**Figure S1.** Fraction of ceftazidime excreted as unchanged ceftazidime in urine.

**Figure S2.** Fold change in systemic and renal clearance of ceftazidime at 10, 20, 30, and 40 GWs.

Table S1 Ceftazidime PBPK model input parameters

|                                        | Parameter                                                           | value                                     | Reference                                    |
|----------------------------------------|---------------------------------------------------------------------|-------------------------------------------|----------------------------------------------|
| Physicochemical properties and binding | Mol Weight (g/mol)                                                  | 546.580                                   | Zhou et al., 2019 (1)                        |
|                                        | log P                                                               | -3.750                                    |                                              |
|                                        | Compound Type                                                       | Diprotic Acid                             |                                              |
|                                        | pKa 1                                                               | 2.430                                     |                                              |
|                                        | pKa 2                                                               | 2.890                                     |                                              |
|                                        | B/P                                                                 | 0.550                                     | Default                                      |
|                                        | fup (Binding Protein)                                               | 0.9 (Human Serum Albumin)                 | Predicted and used as input                  |
| Absorption                             | Absorption (For intramuscular dosing only)                          |                                           |                                              |
|                                        | fa : Mean (%CV)                                                     | 1 (0%CV)                                  | assumed                                      |
|                                        | Ka (1/h): Mean (%CV)                                                | 2 (30%CV)                                 | Adjusted to recover (2, 3)                   |
|                                        | Tlag (h): Mean(%CV)                                                 | 1.5 (30%CV)                               |                                              |
| Distribution                           | Distribution Model                                                  | Full PBPK Model                           |                                              |
|                                        | Vss (L/kg)                                                          | 0.20 (Predicted using Method 2 after (4)) |                                              |
|                                        | Maternal Kp Scalar                                                  | 1.0                                       |                                              |
|                                        | Fetal Kp Scalar                                                     | 1.0                                       |                                              |
| Elimination                            | Elimination option                                                  | Enzyme Kinetics                           |                                              |
|                                        | CL <sub>R</sub> (L/h)                                               | 6.000                                     | Zhou et al., 2019 (1)                        |
|                                        | Biliary CL <sub>int</sub> (μL/min/million hepatocyte)               | 0.085 (30% CV)                            | Adjusted to recover Harding et al., 1983 (2) |
| <b>Pregnancy Model</b>                 |                                                                     |                                           |                                              |
| Feto-placental model                   | CL <sub>PDM</sub> (L/h/mL of placenta volume)                       | 0.00137                                   | Predicted (see text)                         |
|                                        | CL <sub>PDF</sub> (L/h/mL of placenta volume)                       | 0.00137                                   | Predicted (see text)                         |
|                                        | fetal CL <sub>Swallowing</sub> (L/h/kg fetal weight): Mean (%CV)    | 0.00476 (30%)                             | see text                                     |
|                                        | fetal CL <sub>R</sub> (L/h/kg fetal weight)                         | Predicted                                 | GW-dependent (see text)                      |
|                                        | CL <sub>fetus &lt;--&gt; amniotic fluid</sub> (L/h/kg fetal weight) | Predicted                                 | GW-dependent (see text)                      |

Mol Weight= molecular weight; logP=neutral species octanol: buffer partition coefficient; pKa= dissociation constant at logarithmic scale; BP=blood-to-plasma partition ratio; fup=fraction unbound in plasma; CL<sub>R</sub>= renal clearance; CL<sub>PDM</sub>=Passive diffusion clearance for Maternal-placental barrier; CL<sub>PDF</sub>=Passive diffusion clearance for Placental-Fetal barrier

**Table S2.** Collected clinical data on fraction of the dose excreted in the urine from healthy adult non-pregnant subjects (Predicted mean (SD) 87(4) %) .

| Study design               |                     |                                 | Observed |      |       |
|----------------------------|---------------------|---------------------------------|----------|------|-------|
| Ref                        | Dose                | Sample Size (age range (years)) | mean     | SD   | Ratio |
| Harding et al 1983 (5)     | 0.5 g i.v.          | 4 M: 20-49 years                | 100      |      | 0.86  |
|                            | 1 g i.v.            | 4 M: 20-49 years                | 91.6     |      | 0.95  |
|                            | 1g i.m.             | 8 M: 20-49 years                | 82       |      | 1.06  |
| Tjandramaga et al 1982 (6) | 1g i.v.bolus (3min) | 8 (0F): 22-24 years             | 96.2     | 5.5  | 0.90  |
|                            | 1g i.m.             | 8 (0F): 22-24 years             | 92.6     | 6.3  | 0.94  |
| Harding et al 1983 (2)     | 0.5g i.v.           | 8 M: 20-49 years                | 85.6     | 8.2  | 1.01  |
|                            | 1 g i.v.            | 8 M: 20-49 years                | 85.1     | 4.8  | 1.02  |
|                            | 1 g 20 min i.v. inf | 8 M: 20-49 years                | 83.7     | 7.65 | 1.04  |
|                            | 2 g 20-min i.v. inf | 8 M: 20-49 years                | 87.1     | 4.2  | 1.00  |
|                            | 0.5g im             | 8 M: 20-49 years                | 85       | 6.5  | 1.02  |
|                            | 1g i.m.             | 8 M: 20-49 years                | 78.9     | 12   | 1.10  |
| Kemmerich et al 1983 (7)   | 2g i.v. inf 20min   | 8 (50% F): 20-30yrs             | 72       | 12   | 1.22  |
| Sommers et al 1983 (8)     | 1g i.v. bolus       | 16 (8F): 20-45 years            | 76       | 3    | 0.87  |
|                            | 1g i.m.             | 16 (8F): 20-45 years            | 74.7     | 3    | 0.86  |
| Drusano et al., 1984 (9)   | 2g inf over 30min   | 6 (0F): 18 -35 years            | 80       | 10   | 1.10  |
| Koyama et al. 1983 (3)     | 0.5g i.v. bolus     | 3 M: 31 years                   | 91.2     |      | 1.04  |
|                            | 1g i.v. bolus       | 3 M: 31 years                   | 89.3     |      | 0.97  |
|                            | 1g i.v. inf for 1 h | 3 M: 27-29 years                | 89.6     |      | 0.96  |
|                            | 1g i.v. bolus       | 3 M: 23-27 years                | 95       |      | 1.09  |
|                            | 2g i.v. inf for 1 h | 3 M: 27-29 years                | 90.2     |      | 0.96  |
|                            | 2g i.v. inf for 2 h | 3 M : 23-38 years               | 93.3     |      | 0.93  |
|                            | 0.5g im             | 3 M: 23-35 years                | 91.3     |      | 0.94  |
| Saito et al., 1994(10)     | 1g i.v. inf for 1 h | 6 M: 20-23 years                | 91       | 5.1  | 0.95  |

i.v.=intravenous; i.m. =intramuscular; inf=infusion ; M= male; F=female.

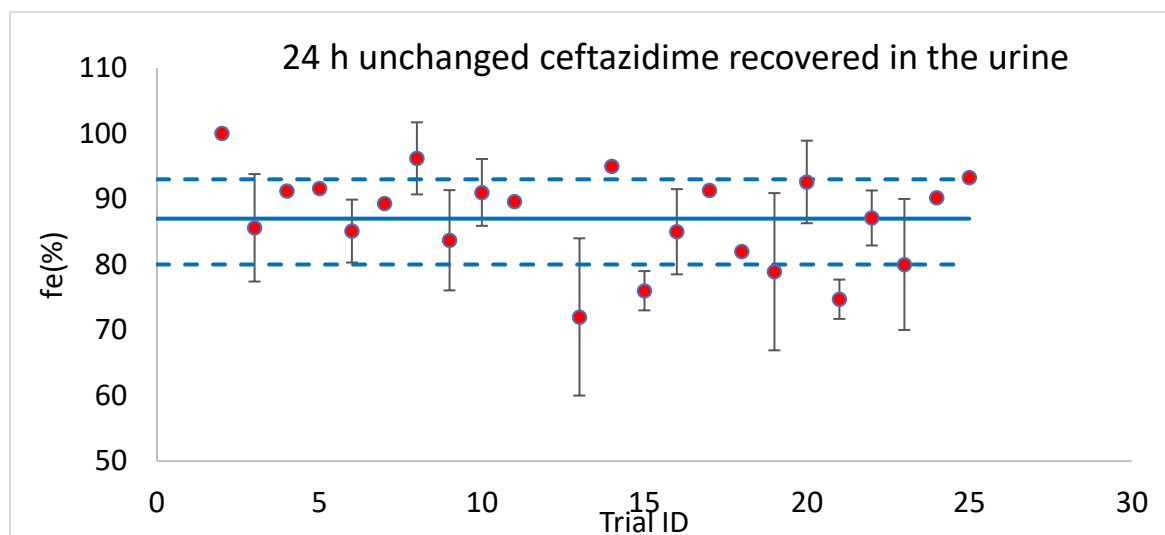**Figure S1.** Fraction of ceftazidime excreted as unchanged ceftazidime in urine. Horizontal lines represent the PBPK model results (solid= mean; dashed= 5<sup>th</sup> and 95<sup>th</sup> percentiles) circles represent reported mean values in different clinical trials with error bars represent standard deviation.

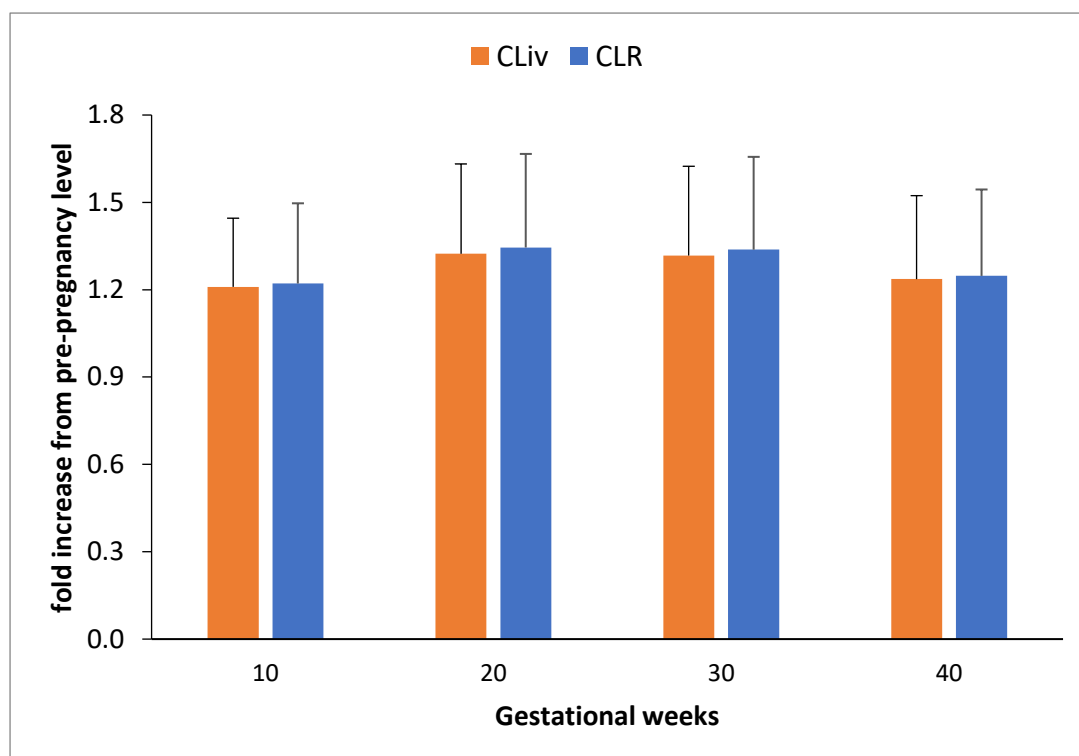

**Figure S2.** Fold change in systemic and renal clearance of ceftazidime at 10, 20, 30, and 40 GWs. Error bars represent standard error.

## References

- (1) Zhou, L., Tong, X., Sharma, P., Xu, H., Al-Huniti, N. & Zhou, D. Physiologically based pharmacokinetic modelling to predict exposure differences in healthy volunteers and subjects with renal impairment: Ceftazidime case study. *Basic Clin Pharmacol Toxicol* **125**, 100-7 (2019).
- (2) Harding, S.M. & Harper, P.B. The pharmacokinetic behaviour of ceftazidime in man and the relationship between serum levels and the in vitro susceptibility of clinical isolates. *Infection* **11 Suppl 1**, S49-53 (1983).
- (3) Koyama, M., Nakagawa, K., Takeda, K., Higo, K. & Okumura, K. Phase-one Clinical Study on Ceftazidime. *Chemotherapy* **31**, 146-55 (1983).
- (4) Rodgers, T. & Rowland, M. Physiologically based pharmacokinetic modelling 2: predicting the tissue distribution of acids, very weak bases, neutrals and zwitterions. *J Pharm Sci* **95**, 1238-57 (2006).
- (5) Harding, S.M., Monro, A.J., Thornton, J.E., Ayrton, J. & Hogg, M.I. The comparative pharmacokinetics of ceftazidime and cefotaxime in healthy volunteers. *J Antimicrob Chemother* **8 Suppl B**, 263-72 (1981).
- (6) Tjandramaga, T.B., Van Hecken, A., Mullie, A., Verbesselt, R., De Schepper, P.J. & Verbist, L. Comparative pharmacokinetics of ceftazidime and moxalactam. *Antimicrob Agents Chemother* **22**, 237-41 (1982).

- (7) Kemmerich, B., Warns, H., Lode, H., Borner, K., Koeppe, P. & Knothe, H. Multiple-dose pharmacokinetics of ceftazidime and its influence on fecal flora. *Antimicrob Agents Chemother* **24**, 333-8 (1983).
- (8) Sommers, D.K., Walters, L., Van Wyk, M., Harding, S.M., Paton, A.M. & Ayrton, J. Pharmacokinetics of ceftazidime in male and female volunteers. *Antimicrob Agents Chemother* **23**, 892-6 (1983).
- (9) Drusano, G.L. *et al.* Comparison of the pharmacokinetics of ceftazidime and moxalactam and their microbiological correlates in volunteers. *Antimicrob Agents Chemother* **26**, 388-93 (1984).
- (10) Saito, A., Nakamichi, N., Obara, M., Watanabe, Y., Sakamoto, H. & Terakawa, M. Pharmacokinetics and serum bactericidal titers of FK037 and ceftazidime in healthy volunteers. *Chemotherapy* **42**, 114-28 (1994).
